# Supplementary material for: Mixed-method investigation of health consumers’ perception and experience of participation in patient safety activities
Source: PubMed Central journal article supplement — BMJ Open. 2020 Mar 25;10(3):e035831. doi: 10.1136/bmjopen-2019-035831 (PMC7170617; doi:10.1136/bmjopen-2019-035831), 2020-03-25
Supplement: bmjopen-2019-035831supp002.pdf [file bmjopen-2019-035831supp002.pdf]

10. 귀하는 주로 건강관련 정보를 어디서 찾으십니까?
- ☐ 인터넷
- ☐ 방송매체(TV, 라디오 등)
- ☐ 신문, 잡지 등의 기사
- ☐ 전문가(의사, 간호사, 영양사 등)
- ☐ 주위사람(가족, 친구 등)
- ☐ 기타
11. 병원에서 본인과 가족이 의료오류를 경험한 적이 있습니까?
- ☐ 있다
- ☐ 없다

II. 환자안전 보고학습시스템

1. 귀하는 환자나 보호자로서 병원에서 의료오류를 발견했을 때, 국가에서 운영하는 환자안전 보고학습시스템(<http://www.kops.or.kr/portal>)을 통해 직접 보고할 수 있다는 것을 알고 계십니까?
- ☐ 알고 있다
- ☐ 모른다
2. 귀하는 병원에서 의료오류를 경험하거나 발견한다면, 국가 환자안전 보고학습시스템에 의료오류를 보고할 것 같습니다?

\*환자안전 보고란? 환자안전사고의 예방 및 의료 질 향상을 위해 개별 의료기관의 환자안전 전담인력 또는 기관의 장, 보건의료인, 환자 및 보호자 등 보건의료서비스를 제공하거나 제공받는 사람이 인지한 환자안전사고 내용을 보고학습시스템(<http://www.kops.or.kr/portal>) 운영기관에 보고하는 것입니다.

| 전혀<br>보고하지 않을 것이다 | 가끔<br>보고할 것이다 | 종종<br>보고할 것이다 | 항상<br>보고할 것이다 |
|-------------------|---------------|---------------|---------------|
| 1                 | 2             | 3             | 4             |

다음은 환자참여에 대한 문항입니다.

설문은 3개 영역, 각 13개 문항으로 구성되어 있습니다.

동일한 문항으로

1)환자 참여 활동에 대한 의향, 2) 환자 참여 활동의 중요성, 3) 환자 참여 활동 경험을 측정합니다.

1) 환자 참여 활동의 의향은 본인의 건강관리와 관련하여 각 환자 참여 행동을 얼마나 할 것 같은지를 묻는 문항입니다.

2) 환자 참여 활동의 중요성은 각 항목의 환자 참여 행동의 환자 안전을 향상시키기 위해 얼마나 중요하다고 생각하는지를 묻는 문항입니다.

3) 환자 참여 활동의 경험은 각 항목의 환자 참여 행동의 경험 정도를 묻는 문항입니다.

해당하는 곳에 표시하여 주십시오.

### III. 환자 참여에 대한 의향

병원에 입원하거나 외래를 방문한 환자로서의 경험을 바탕으로 답하여 주십시오. 그런 경험이 없을 경우는 본인이 환자인 상황을 가정하여 답해 주시기 바랍니다. 귀하는 건강 관리와 관련하여 다음과 같은 행동을 얼마나 할 것 같습니까?

|                                                                                       | 전혀<br>그렇지<br>않을<br>것이다 | 다소<br>그렇<br>것이다 | 종종<br>그렇<br>것이다 | 매우<br>그렇<br>것이다 |
|---------------------------------------------------------------------------------------|------------------------|-----------------|-----------------|-----------------|
| 1. 치료의 결정을 할 때 추가적인 전문 의견이 듣고 싶은 경우 처음 진료를 받던 의사와 다른 의사에게 의견을 구한다.                    | 1                      | 2               | 3               | 4               |
| 2. 보건의료직원(예, 의사, 간호사)이 설명했으나 이해하지 못한 부분에 대해 좀 더 자세하게 설명해 줄 것을 요구한다.                   | 1                      | 2               | 3               | 4               |
| 3. 진료를 받으러 갈 때, 보건의료직원(예, 의사, 간호사)이 말하는 내용을 이해하고 질문하는 것을 도와줄 수 있도록 가족이나 친척(친구)을 데려간다. | 1                      | 2               | 3               | 4               |
| 4. 보건의료직원(예, 의사, 간호사)에게 진료나 처치 전에 손을 씻었는지 물어본다.                                       | 1                      | 2               | 3               | 4               |
| 5. 보건의료직원(예, 의사, 간호사)이 약물 알레르기에 대해 물어보지 않더라도 약물 알레르기가 있으면 말한다.                        | 1                      | 2               | 3               | 4               |
| 6. 시술을 받기 전에 보건의료직원(예, 의사, 간호사)이 환자의 신원을 확인하지 않을 경우, 확인하도록 요청한다.                      | 1                      | 2               | 3               | 4               |
| 7. 시술(수술)을 받기 전에 시술(수술)의 세부사항(예, 목적, 시간이 얼마나 걸리는지, 회복과정 등)에 대해 물어본다.                  | 1                      | 2               | 3               | 4               |
| 8. 의사나 간호사에게 설명 받지 않았던 검사(예, 엑스레이, 혈액검사)를 시행하려고 하면 검사 전 필요성과 자세한 설명을 요구한다             | 1                      | 2               | 3               | 4               |
| 9. 검사를 받고 일정한 시간이 지난 후에도 검사결과를 듣지 못한 경우, 의료진이나 병원에 연락을 한다.                            | 1                      | 2               | 3               | 4               |
| 10. 진료를 받으러 갈 때 현재 복용하고 있는 모든 약물의 목록이나 약물을 가져간다.                                      | 1                      | 2               | 3               | 4               |
| 11. 무슨 약인지 잘 모르겠고 복용한 적이 없는 약을 설명 없이 받았을 때, 약에 대해 물어본다.                               | 1                      | 2               | 3               | 4               |
| 12. 약국에서 나오기 전에 정확한 약물을 받았는지 확인한다.                                                    | 1                      | 2               | 3               | 4               |
| 13. 병원에서 의료오류를 경험하거나 발견한다면, 국가 환자안전 보고학습시스템에 의료오류를 보고한다.                              | 1                      | 2               | 3               | 4               |

#### IV. 환자 참여의 중요성

환자안전\*을 향상시키기 위해 귀하는 건강 관리와 관련하여 **다음의 항목이 얼마나 중요하다고 생각하십니까?**

\* 환자안전이란? 환자안전은 의료와 관련된 불필요한 위해의 위험을 최소한으로 낮추는 것을 의미합니다(WHO, 2009).

|                                                                                       | 매우<br>중요<br>하지<br>않다 | 중요<br>하지<br>않다 | 중요<br>하다 | 매우<br>중요<br>하다 |
|---------------------------------------------------------------------------------------|----------------------|----------------|----------|----------------|
| 1. 치료의 결정을 할 때 추가적인 전문 의견이 듣고 싶은 경우 처음 진료를 받던 의사와 다른 의사에게 의견을 구한다.                    | 1                    | 2              | 3        | 4              |
| 2. 보건의료직원(예, 의사, 간호사)이 설명했으나 이해하지 못한 부분에 대해 좀 더 자세하게 설명해 줄 것을 요구한다.                   | 1                    | 2              | 3        | 4              |
| 3. 진료를 받으러 갈 때, 보건의료직원(예, 의사, 간호사)이 말하는 내용을 이해하고 질문하는 것을 도와줄 수 있도록 가족이나 친척(친구)을 데려간다. | 1                    | 2              | 3        | 4              |
| 4. 보건의료직원(예, 의사, 간호사)에게 진료나 처치 전에 손을 씻었는지 물어본다.                                       | 1                    | 2              | 3        | 4              |
| 5. 보건의료직원(예, 의사, 간호사)이 약물 알레르기에 대해 물어보지 않더라도 약물 알레르기가 있으면 말한다.                        | 1                    | 2              | 3        | 4              |
| 6. 시술을 받기 전에 보건의료직원(예, 의사, 간호사)이 환자의 신원을 확인하지 않을 경우, 확인하도록 요청한다.                      | 1                    | 2              | 3        | 4              |
| 7. 시술(수술)을 받기 전에 시술(수술)의 세부사항(예, 목적, 시간이 얼마나 걸리는지, 회복과정 등)에 대해 물어본다.                  | 1                    | 2              | 3        | 4              |
| 8. 의사나 간호사에게 설명 받지 않았던 검사(예, 엑스레이, 혈액검사)를 시행하려고 하면 검사 전 필요성과 자세한 설명을 요구한다             | 1                    | 2              | 3        | 4              |
| 9. 검사를 받고 일정한 시간이 지난 후에도 검사결과를 듣지 못한 경우, 의료진이나 병원에 연락을 한다.                            | 1                    | 2              | 3        | 4              |
| 11. 진료를 받으러 갈 때 현재 복용하고 있는 모든 약물의 목록이나 약물을 가져간다.                                      | 1                    | 2              | 3        | 4              |
| 11. 무슨 약인지 잘 모르겠고 복용한 적이 없는 약을 설명 없이 받았을 때, 약에 대해 물어본다.                               | 1                    | 2              | 3        | 4              |
| 12. 약국에서 나오기 전에 정확한 약물을 받았는지 확인한다.                                                    | 1                    | 2              | 3        | 4              |
| 13. 병원에서 의료오류를 경험하거나 발견한다면, 국가 환자안전 보고학습시스템에 의료오류를 보고한다.                              | 1                    | 2              | 3        | 4              |

## V. 환자 참여 경험

귀하는 건강 관리와 관련하여 다음 활동에 얼마나 자주 참여하십니까?

|                                                                                       | 전혀<br>그렇지<br>않다 | 가끔<br>그렇다 | 자주<br>그렇다 | 항상<br>그렇다 |
|---------------------------------------------------------------------------------------|-----------------|-----------|-----------|-----------|
| 1. 치료의 결정을 할 때 추가적인 전문 의견이 듣고 싶은 경우 처음 진료를 받던 의사와 다른 의사에게 의견을 구한다.                    | 1               | 2         | 3         | 4         |
| 2. 보건의료직원(예, 의사, 간호사)이 설명했으나 이해하지 못한 부분에 대해 좀 더 자세하게 설명해 줄 것을 요구한다.                   | 1               | 2         | 3         | 4         |
| 3. 진료를 받으러 갈 때, 보건의료직원(예, 의사, 간호사)이 말하는 내용을 이해하고 질문하는 것을 도와줄 수 있도록 가족이나 친척(친구)을 데려간다. | 1               | 2         | 3         | 4         |
| 4. 보건의료직원(예, 의사, 간호사)에게 진료나 처치 전에 손을 씻었는지 물어본다.                                       | 1               | 2         | 3         | 4         |
| 5. 보건의료직원(예, 의사, 간호사)이 약물 알레르기에 대해 물어보지 않더라도 약물 알레르기가 있으면 말한다.                        | 1               | 2         | 3         | 4         |
| 6. 시술을 받기 전에 보건의료직원(예, 의사, 간호사)이 환자의 신원을 확인하지 않을 경우, 확인하도록 요청한다.                      | 1               | 2         | 3         | 4         |
| 7. 시술(수술)을 받기 전에 시술(수술)의 세부사항(예, 목적, 시간이 얼마나 걸리는지, 회복과정 등)에 대해 물어본다.                  | 1               | 2         | 3         | 4         |
| 8. 의사나 간호사에게 설명 받지 않았던 검사(예, 엑스레이, 혈액검사)를 시행하려고 하면 검사 전 필요성과 자세한 설명을 요구한다.            | 1               | 2         | 3         | 4         |
| 9. 검사를 받고 일정한 시간이 지난 후에도 검사결과를 듣지 못한 경우, 의료진이나 병원에 연락을 한다.                            | 1               | 2         | 3         | 4         |
| 12. 진료를 받으러 갈 때 현재 복용하고 있는 모든 약물의 목록이나 약물을 가져간다.                                      | 1               | 2         | 3         | 4         |
| 11. 무슨 약인지 잘 모르겠고 복용한 적이 없는 약을 설명 없이 받았을 때, 약에 대해 물어본다.                               | 1               | 2         | 3         | 4         |
| 12. 약국에서 나오기 전에 정확한 약물을 받았는지 확인한다.                                                    | 1               | 2         | 3         | 4         |
| 13. 병원에서 의료오류를 경험하거나 발견한다면, 국가 환자안전 보고학습시스템에 의료오류를 보고한다.                              | 1               | 2         | 3         | 4         |

설문이 종료되었습니다.
