# Supplementary figures and images for: Mixed-method investigation of health consumers’ perception and experience of participation in patient safety activities
Source: PubMed Central journal article supplement — BMJ Open. 2020 Mar 25;10(3):e035831. doi: 10.1136/bmjopen-2019-035831 (PMC7170617; doi:10.1136/bmjopen-2019-035831), 2020-03-25

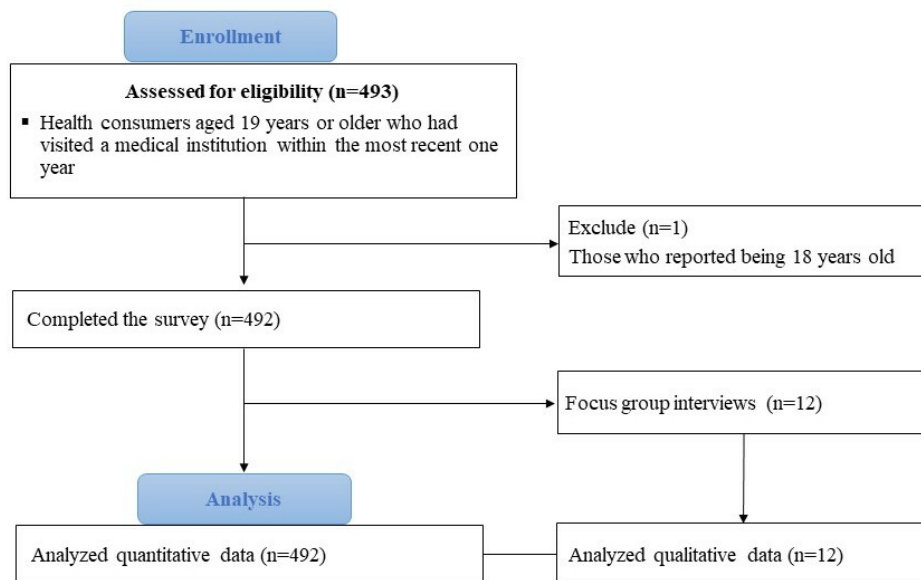

Supplementary figure 1

Supplement: bmjopen-2019-035831supp001.pdf [file bmjopen-2019-035831supp001.pdf]
